# Supplementary material for: Whispering gallery mode emission generated in tunable quantum dot doped glycerol/water and ionic liquid/water microdroplets formed on a superhydrophobic coating
Source: Royal Society of Chemistry journal article supplement (doi:10.1039/c1jm10531k), 2011-01-01
Supplement: c1jm10531k.pdf [file c1jm10531k.pdf]

# Whispering Gallery Mode Emission Generated in Tunable Quantum Dot Doped Glycerol/Water and Ionic Liquid/Water Microdroplets Formed on a Superhydrophobic Coating

Edin Nuhiji,<sup>\*a</sup> François G. Amar,<sup>\*b</sup> Hongxia Wang,<sup>a</sup> Nolene Byrne,<sup>a</sup> Tich-Lam Nguyen<sup>c</sup> and Tong Lin<sup>a</sup>

## Electronic Supplementary Information

### Time dependent WGM emission analysis of glycerol/water and ionic liquid/water microdroplets

Employing a QD based WGM reporting system alleviates problems associated with photobleaching irrespective of reporter concentration in the microdroplet. As a result, a WGM performance analysis was conducted during continuous free beam excitation of a water/glycerol QD-doped microdroplet. Maximum laser beam output (465.5  $\mu$ W) was coupled to the microdroplet for over 20 minutes to produce an extreme excitation environment while examining the WGM emission stability. Figure ESI. 1a displays the  $\lambda_{\text{max}}$  coordinates of 4 selected modes generated by the microdroplet which were monitored at each time point. The microdroplets WGM exhibited a total blue shift of 19.5 nm (droplet evaporation). Apart from this, the WGM signal photointensity decreased minimally, the  $Q$ -factor and the number of identifiable peaks remained relatively unchanged. Employing these same excitation parameters, a QD-doped ionic liquid microdroplet is shown to generate a far more stable WGM signal (4 nm total blue shift) (ESI. 1(b-c)).

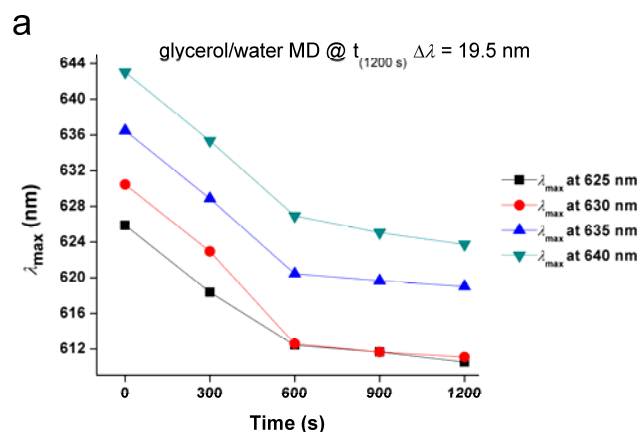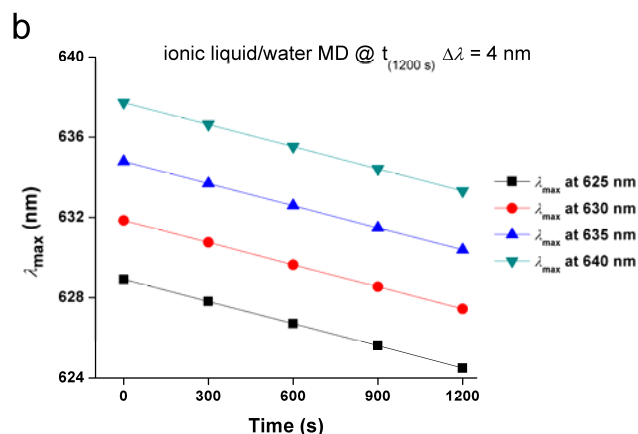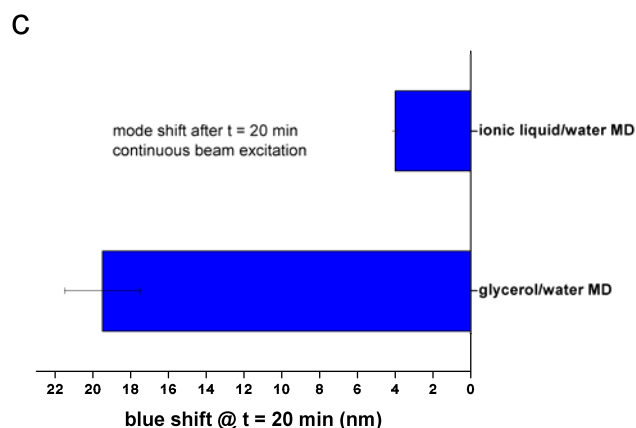

**ESI. 1** Time dependent microdroplet WGM emission analysis. Utilizing a maximum (465.5  $\mu$ W) laser energy, emission spectra from a single glycerol/water (12.24  $\mu$ m) and single ionic liquid-microdroplet (11.80  $\mu$ m) were collected at 0 s, 300 s, 600 s, 900 s and 1200 s during continuous beam exposure. Four modes positioned about wavelengths 625 nm, 630 nm, 635 nm and 640 nm were monitored during excitation. (a) Water/glycerol microdroplet. (b) ionic liquid microdroplet; (c) Blue shift comparison of ionic liquid/water and glycerol/water microdroplets after 20 min (1200s) continuous wave excitation. The error bars represent the standard deviation of the WGM shift of 4 modes during the experimental duration.
